# Supplementary material
Source: PubMed Central journal article supplement (PMC10587828)
Supplement: jamaoncol-e234273-s002.pdf [file jamaoncol-e234273-s002.pdf]

## Data Sharing Statement

Volesky-Avellaneda. Cancers Attributable to Infections in the US in 2017. *JAMA Oncol.* Published October 19, 2023. doi:10.1001/jamaoncol.2023.4273

### Data

**Data available:** Yes

**Data types:** Data (not involving human participants)

**How to access data:** The relevant data are available within the manuscript and its supplement.

**When available:** With publication

### Supporting Documents

**Document types:** None

### Additional Information

**Who can access the data:** Those who can access the manuscript and its supplement.

**Types of analyses:** Any purpose

**Mechanisms of data availability:** Interested individuals can take the data from the manuscript and/or its supplement.
